# Supplementary material for: FuncTree2: an interactive radial tree for functional hierarchies and omics data visualization
Source: Bioinformatics. 2019 Apr 20;35(21):4519–21. doi: 10.1093/bioinformatics/btz245 (PMC6821421; doi:10.1093/bioinformatics/btz245)
Supplement: btz245_Supplementary_Table_S1 [file btz245_supplementary_table_s1.xlsx]

## Sheet: Feature comparison of FuncTree2
		FuncTree 2	FuncTree	Krona Charts
Visualization	Multiple samples	✔	-	-
	Two types of data	✔	-	-
	Complementary visualization	✔	-	-
	Built-in mapping on hierarchy	✔	✔	-
	Re-rooting of tree	✔	Limited	✔
	Generic hierarchy visualization	✔	-	✔
	Smooth transition on update	✔	-	✔
	Search nodes	✔	-	✔
Functional analysis	Metabolic module coverage	✔	-	-
	Comparative analysis	✔	-	-
	Metagenomic enrichment test	-	✔	-
Integration	Part of an analysis pipeline	✔	-	✔
	Seamless import of output from major bioinformatic tools	-	-	✔
	Multiple annotation sources	✔	-	✔
Availability	Web	✔	✔	-
	REST API	✔	-	-
	Command line	-	-	✔
	No installation required	-	-	✔
